# Supplementary material for: Topological defects induced by air inclusions in ferroelectric nematic liquid crystals with ionic doping
Source: Royal Society of Chemistry journal article supplement (doi:10.1039/d4sm01261e), 2025-01-01
Supplement: d4sm01261e1.pdf [file d4sm01261e1.pdf]

## Supplementary Information

### Topological Defects Induced by Air Inclusions in Ferroelectric

#### Nematic Liquid Crystals with Ionic Doping

Zhongjie Ma<sup>a</sup>, Shengzhu Yi<sup>a,b</sup>, Miao Jiang<sup>a</sup>, Mingjun Huang<sup>c,d</sup>, Satoshi Aya<sup>c,d</sup>, Rui Zhang<sup>b</sup>,  
Qi-Huo Wei<sup>\*a,c</sup>

<sup>a</sup> Department of Mechanical and Energy Engineering, Southern University of Science and Technology; Shenzhen, 518055, China.

<sup>b</sup> Department of Physics, The Hongkong University of Science and Technology, Clear Water Bay, Hong Kong, China.

<sup>c</sup> Guangdong Provincial Key Laboratory of Functional and Intelligent Hybrid Materials and Devices, South China University of Technology; Guangzhou 510640, China.

<sup>d</sup> South China Advanced Institute for Soft Matter Science and Technology (AISMST), School of Emergent Soft Matter, South China University of Technology; Guangzhou 510640, China.

<sup>e</sup> Center for Complex Flows and Soft Matter Research, Southern University of Science and Technology; Shenzhen 518055, China.

\*Corresponding Authors

E-mail: weiqh@sustech.edu.cn

The file includes:

Figure S1-S3

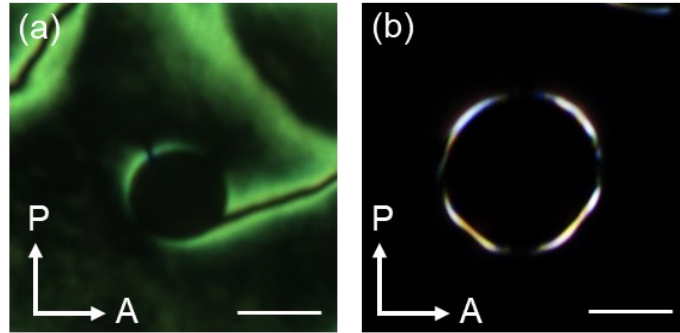

**Figure S1** The cross polarized optical images of CTAB (a) and PDMAOP (b) doped RM734 in the N phase. The scale bars are 20  $\mu\text{m}$ . The cell thickness is 5  $\mu\text{m}$ .

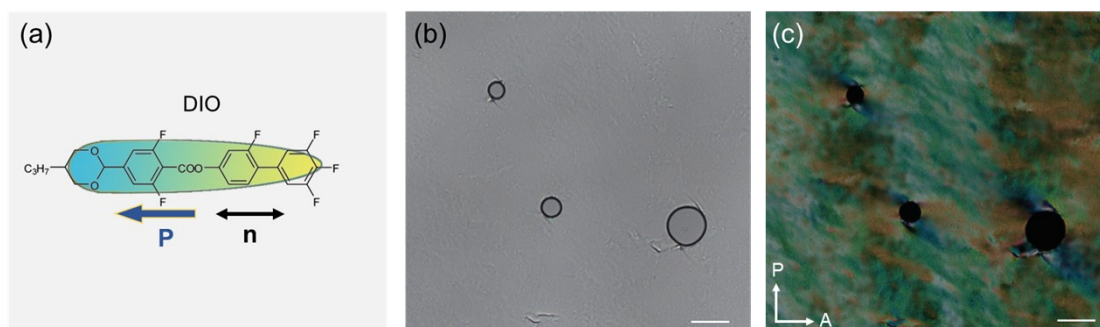

**Figure S2** (a) The molecular structure of DIO. (b-c) Typical bright field (b) and cross polarized optical (c) image of topological defects around air inclusions for PDMAOP doped DIO (0.1 wt%). The images were obtained at 55°C and the texture is the chiral ground state. The scale bars are 50  $\mu\text{m}$ . The cell thickness is 5  $\mu\text{m}$ .

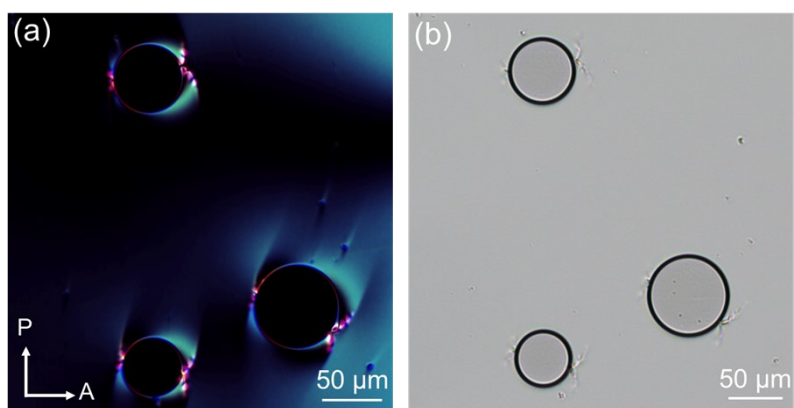

**Figure S3** Polarized (a) and bright field (b) images of topological defects around air inclusions in PDTAC doped RM734. The cell thickness is 5  $\mu\text{m}$ .
